# Supplementary material for: Fusarium Head Blight and Associated Mycotoxins in Grains and Straw of Barley: Influence of Agricultural Practices
Source: MDPI journal article supplement (doi:10.3390/agronomy11040801), 2021-04-19
Supplement: s1 [file s1]

# SUPPLEMENTARY TABLES

**Table S1.** Total number of grain and straw samples received per canton of Switzerland in 2016 and 2017.

| <b>Canton</b>    | <b>Grain <sup>1</sup></b> | <b>Straw <sup>1</sup></b> |
|------------------|---------------------------|---------------------------|
| Jura             | 30                        | 29                        |
| Aargau           | 23                        | 23                        |
| Bern             | 23                        | 21                        |
| Vaud             | 21                        | 20                        |
| Zürich           | 21                        | 20                        |
| Graubünden       | 16                        | 14                        |
| Schaffhausen     | 15                        | 13                        |
| Genève           | 14                        | 13                        |
| Thurgau          | 13                        | 13                        |
| Luzern           | 12                        | 12                        |
| St. Gallen       | 12                        | 11                        |
| Zug              | 10                        | 10                        |
| Neuchâtel        | 10                        | 9                         |
| Solothurn        | 9                         | 8                         |
| Fribourg         | 9                         | 6                         |
| Valais           | 7                         | 7                         |
| Basel-Landschaft | 5                         | 5                         |
| Ticino           | 2                         | 2                         |

<sup>1</sup> One sample was received undeclared

**Table S2.** Limit of detection (LOD,  $\mu\text{g kg}^{-1}$ ) and number of positive samples ( $\geq$  LOD) for each analysed *Fusarium* mycotoxin in grain (n = 253) and straw (n = 237) samples of barley.

| <i>Fusarium</i> Mycotoxin | Grains |                  | Straw |                  |
|---------------------------|--------|------------------|-------|------------------|
|                           | LOD    | Positive Samples | LOD   | Positive Samples |
| Antibiotic Y              | 8.7    | 98               | 34.9  | 77               |
| Apicidin                  | 0.20   | 73               | 0.78  | 131              |
| Aurofusarin               | 5.0    | 200              | 20.0  | 146              |
| Beauvericin               | 0.01   | 85               | 0.04  | 187              |
| Butenolide                | 3.23   | 124              | 12.9  | 23               |
| Culmorin                  | 1.64   | 158              | 6.58  | 141              |
| Deoxynivalenol            | 1.0    | 197              | 4.0   | 163              |
| Enniatins <sup>1</sup>    | 0.17   | 253              | 0.69  | 237              |
| Equisetin                 | 0.69   | 192              | 2.76  | 161              |
| Moniliformin              | 1.52   | 191              | 6.07  | 154              |
| Nivalenol                 | 0.77   | 83               | 3.08  | 68               |
| Zearalenone               | 0.19   | 95               | 0.76  | 52               |

<sup>1</sup> Enniatins: sum of enniatin A, A1, B, B1, B2 and B3
